# Supplementary material for: MTDH impairs PPARα-mediated fatty acid oxidation to aggravate renal lipotoxicity in diabetic kidney disease
Source: Research Square preprint supplement (doi:10.21203/rs.3.rs-8463665/v1), 2026-01-20
Supplement: Supplementary file 1 [file 86e2d8b492047183b2ad9927.docx]

| Gene | Species | Primer Sequence（5’-3’） |
| --- | --- | --- |
| *Mtdh*  *Acadm*  *Cpt1a*  *Ppara*  *ADRP*  *KIM-1*  *β-Actin*  *lcn2*  *β-Actin*  *Mtdh*  *Ppara*  *Cpt1a*  *Acadl*  *Acadm* | Mouse  Mouse  Mouse  Mouse  Mouse  Mouse  Mouse  Mouse  Rat  Rat  Rat  Rat  Rat  Rat | Forward: GATAACTCTCACACACAGGACACA  Reverse: AGTGCTCATGGTCTTCAGGGA  Forward: ACGAAGCCACGAAGTATGCC  Reverse: TCATCGCCATTTCTGCGAGC  Forward: ACCATCCACGCCATACTGCT  Reverse: GACGTGTTGGATGGTGTCTGT  Forward: CCAGCAACAACCCGCCTTT  Reverse: GGCAGCAGTGGAAGAATCGG  Forward: TCTCGGGCTTATCACCAGGC  Reverse: AGCCGATGCTTCTCTTCCAC  Forward: TCAGAAGAGCAGTCGGTACAAC  Reverse: CGTGTGGGAATCTCTGGTTT  Forward: CTGCCGCATCCTCTTCCTC  Reverse: GCCACAGGATTCCATACCCAA  Forward: ACCACGGACTACAACCAGTTC  Reverse:CAGCTCCTTGGTTCTTCCATAC  Forward: CCGCATCTTCTTGTGCAGTG  Reverse: CCGCATCTTCTTGTGCAGTG  Forward: ATCAGTGGGATGGTAGCCGT  Reverse: GTCTTCTGTGTCCTGGGTGA  Forward: CGTTCGCAGCTGTTTTGTGG  Reverse: TGGCTCGCCTCTAAGATCCC  Forward: ATTTGTGGGAGTATGTCATGG  Reverse: GGTTGGTGTCTCCTTTACAG  Forward: TCCGCTTCCATGGCGAAATA  Reverse: GCATCCACGTAGGCTTTTGC  Forward: GCAGCTGATGATGTGTGCCT  Reverse: CTTTGGTCTTAATGCCCGCC |
