# Supplementary material for: MTDH impairs PPARα-mediated fatty acid oxidation to aggravate renal lipotoxicity in diabetic kidney disease
Source: Research Square preprint supplement (doi:10.21203/rs.3.rs-8463665/v1), 2026-01-20
Supplement: Supplementary file 2 [file d4318eaad551c61161f2b46e.docx]

| **Antibodies** | **SOURCE** |
| --- | --- |
| Rabbit anti-MTDH | Abcam |
| Rabbit anti-BAX | Proteintech |
| Rabbit anti-PPARα | Abcam |
| Mouse anti-ADRP | Proteintech |
| Rabbit anti-NOX4 | Affinity |
| Rabbit anti-Fibronectin | Abcam |
| Rabbit anti-CPT1a | Affinity |
| Rabbit anti-ACADL | Proteintech |
| Rabbit anti-β-Actin | Proteintech |
| Mouse anti-4-HNE | [Invitrogen](https://www.bing.com/aclick?ld=e8KbTuafdDa6qSu9GCnN7nnzVUCUx6cbRmpUn0yHqgMTrwxJoneuXayiu9RfG4yTEYmZQqhurLgwlBYG_Q5_BwrcL5GSpVlyysk3GQ8VwK2PzmG6OgnpSIDeFuLSeHtJpuqebpR3USW7DpGMy3K_2uDJ23_Rs0VM8D95EZ3fGfkoKYgObnx4sDEWyX8aKKb8PXdvHiLCLeh3m_9rr5n8bRP60mNa4&u=aHR0cHMlM2ElMmYlMmZ3d3cudGhlcm1vZmlzaGVyLmNuJTJmY24lMmZ6aCUyZmhvbWUlMmZsaWZlLXNjaWVuY2UlMmZhbnRpYm9kaWVzLmh0bWwlM2ZDSUQlM2RiaWRfcGNhX2F1cF9yMDRfY25fMHNlX2JuZ19idF9hd2FfQUlTRURfZ2VuZV9JQVdfYUJJRF9wY19ta3RfMTExMjI1X05DMEswQklEMDAxMzM5NTUlMjZtc2Nsa2lkJTNkMzY3ZDIyZWJhZmFlMTFmODkzNGQ0YmRmZTdlMGQzMDg&rlid=367d22ebafae11f8934d4bdfe7e0d308) |
| Rabbit anti-IL-1β | Proteintech |
