# Supplementary material for: MTDH impairs PPARα-mediated fatty acid oxidation to aggravate renal lipotoxicity in diabetic kidney disease
Source: Research Square preprint supplement (doi:10.21203/rs.3.rs-8463665/v1), 2026-01-20
Supplement: Supplementary file 3 [file e8aa3c7759e403aea4eda617.docx]

| siRNA(Rat) | Sense (5ʹ-3ʹ) | Antisense (5ʹ-3ʹ) |
| --- | --- | --- |
| si-Mtdh1 | CAACAGCGUAAACGUGAUATT | UAUCACGUUUACGCUGUUGTT |
| si-Mtdh2 | CACCGAGCAACUUACAACUTT | AGUUGUAAGUUGCUCGGUGTT |
| si-NC | AGUUGUAAGUUGCUCGGUGTT | ACGUGACACGUUCGGAGAATT |
